# Supplementary material for: Human cytomegalovirus mediates APOBEC3B relocalization early during infection through a ribonucleotide reductase-independent mechanism
Source: PubMed Central journal article supplement (PMC10506462; doi:10.1128/jvi.00781-23), 2023-08-11
Supplement: jvi.00781-23-s0001.pdf [file jvi.00781-23-s0001.pdf]

1 Supplementary Figs. S1-S4 for:  
2  
3

4 **Human cytomegalovirus mediates APOBEC3B relocalization early during infection**  
5 **through a ribonucleotide reductase-independent mechanism**  
6  
7  
8

9 Elisa Fanunza<sup>1,2</sup>, Adam Z. Cheng<sup>3</sup>, Ashley A. Auerbach<sup>1</sup>, Bojana Stefanovska<sup>1,4</sup>, Sofia N.  
10 Moraes<sup>3</sup>, James R. Lokensgard<sup>5</sup>, Matteo Biolatti<sup>6</sup>, Valentina Dell'Oste<sup>6</sup>, Craig J. Bierle<sup>7</sup>,  
11 Wade A. Bresnahan<sup>8</sup>, Reuben S. Harris<sup>1,4\*</sup>  
12  
13  
14

15 <sup>1</sup> Department of Biochemistry and Structural Biology, University of Texas Health San  
16 Antonio, San Antonio, TX 78229, USA

17 <sup>2</sup> Department of Life and Environmental Sciences, University of Cagliari, Cittadella  
18 Universitaria di Monserrato, Monserrato (Cagliari), SS554, 09042, Italy

19 <sup>3</sup> Department of Biochemistry, Molecular Biology and Biophysics, University of Minnesota,  
20 Minneapolis, MN 55455, USA

21 <sup>4</sup> Howard Hughes Medical Institute, University of Texas Health San Antonio, San Antonio,  
22 TX 78229, USA

23 <sup>5</sup> Department of Medicine, University of Minnesota, Minneapolis, MN, 55455, USA

24 <sup>6</sup> Department of Public Health and Pediatric Sciences, University of Turin, Turin, 10126,  
25 Italy

26 <sup>7</sup> Department of Pediatrics, Division of Pediatric Infectious Diseases and Immunology,  
27 University of Minnesota, Minneapolis, MN 55455, USA

28 <sup>8</sup> Department of Microbiology and Immunology, University of Minnesota, MN 55455, USA  
29

30 \* Correspondence: [rsh@uthscsa.edu](mailto:rsh@uthscsa.edu)  
31

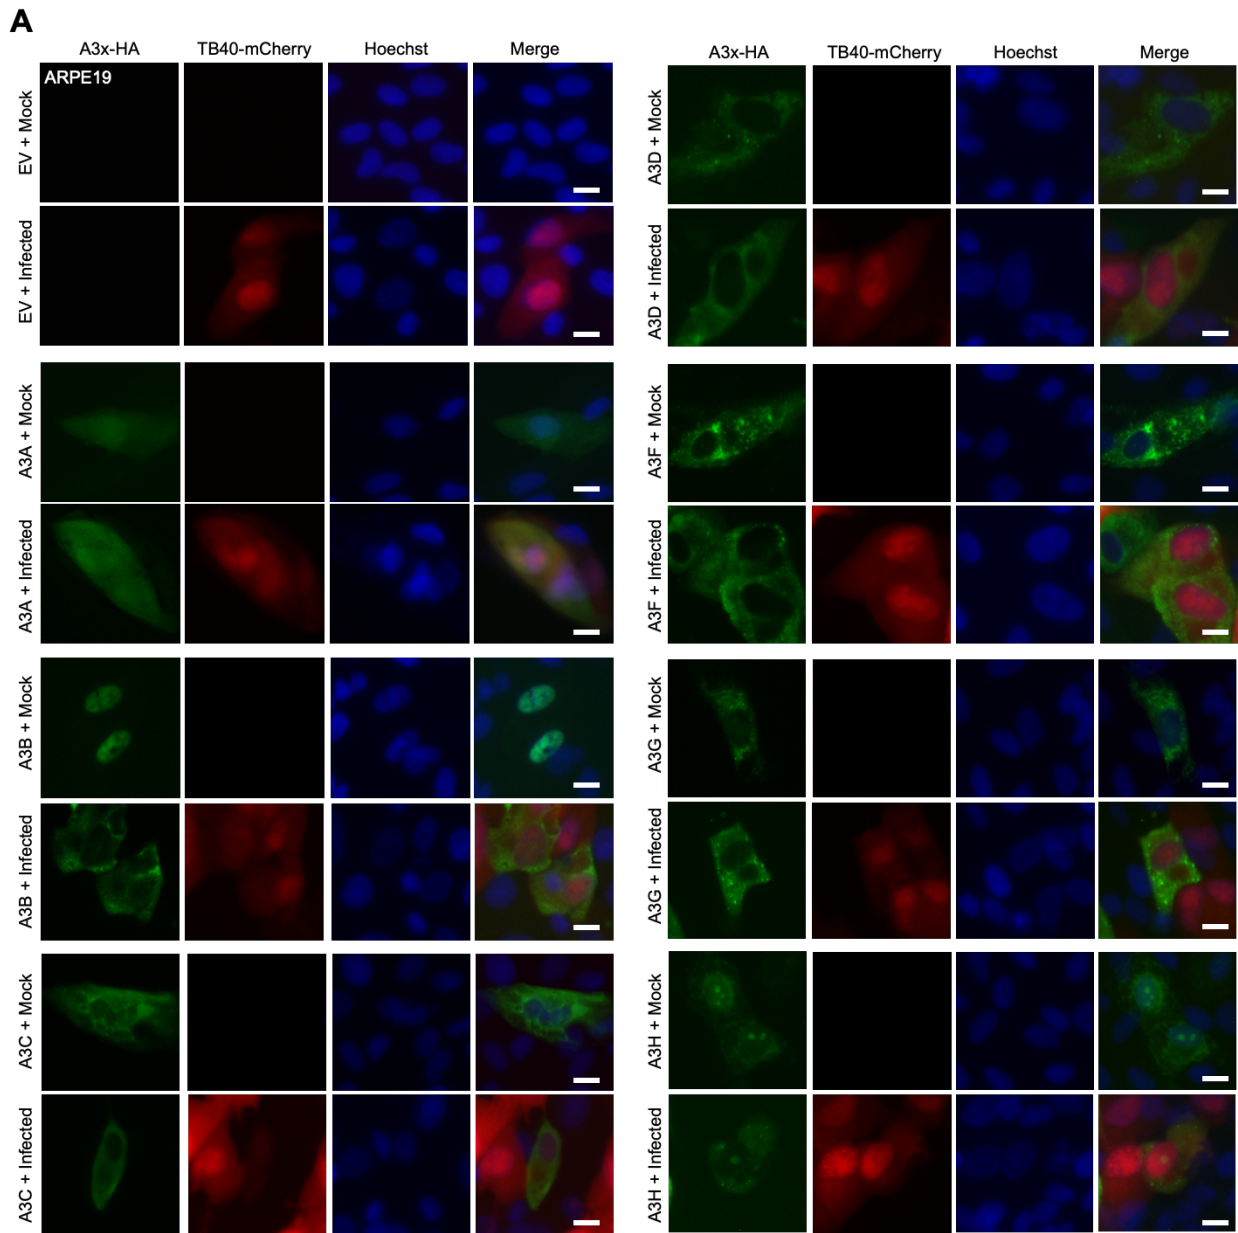

32

33

34 **Fig. S1. Human A3 subcellular localization phenotypes following HCMV infection.**

35 Representative IF microscopy images of ARPE19 cells transfected with the indicated

36 A3x-HA construct (green), infected with TB40-mCherry (red), and imaged 72 hpi (10  $\mu$ m

37 scale). All constructs encode wildtype human A3 proteins except A3A-E72A, which has

38 a catalytic mutation to prevent toxicity.

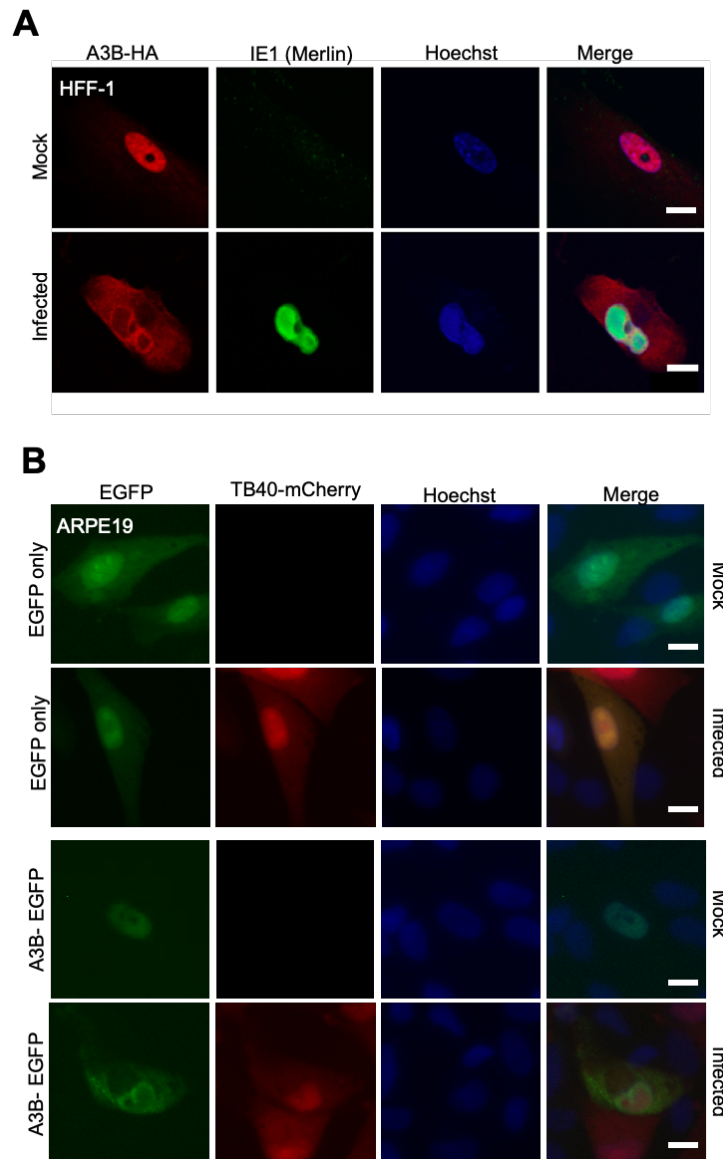

40  
41  
42  
43

**Fig. S2. A3B is relocated by HCMV Merlin and TB40-mCherry.**

44 (A) Representative IF microscopy images of HFF-1 cells expressing A3B-HA (red), mock  
45 or infected with Merlin strain (green) for 72 hrs (10  $\mu$ m scale).

46 (B) Representative IF images of ARPE19 cells transfected with EGFP only or A3B-EGFP  
47 (green), mock or infected with TB40-mCherry (red) for 72 hrs (10  $\mu$ m scale).

48  
49  
50

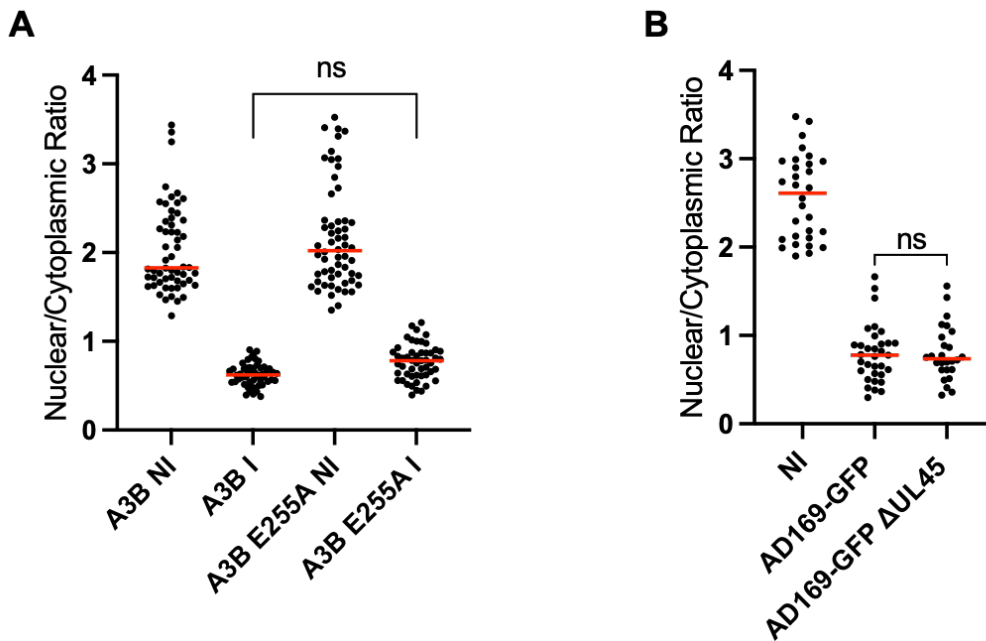

51  
52

53 **Fig. S3. Quantification of A3B and A3B-E255A relocalization phenotypes.**

54 **(A)** HFF-1 stably expressing wt A3B or A3B-E255A were not infected (NI) or infected (I)  
55 with the AD169-GFP strain for 72 hrs. Quantification of Nuclear/Cytoplasmic Ratio of  
56 signal intensity for A3B or A3B-E255A with results showing that infection causes similarly  
57 strong relocalization phenotypes for both proteins (n>50 cells per condition; red lines are  
58 average values; ns, not significant, p = 0.34 by unpaired student's t-test).

59 **(B)** U373 stably expressing A3B or A3B-E255A were not infected (NI) or infected (I) with  
60 AD169 or AD169ΔUL45 for 72 hrs. Quantification of Nuclear/Cytoplasmic A3B Intensity  
61 Ratio, with both viruses triggering similar relocalization phenotypes (n>25 cells per  
62 condition; red lines are average values; ns, not significant, p = 0.94 by unpaired student's  
63 t-test).

64

65

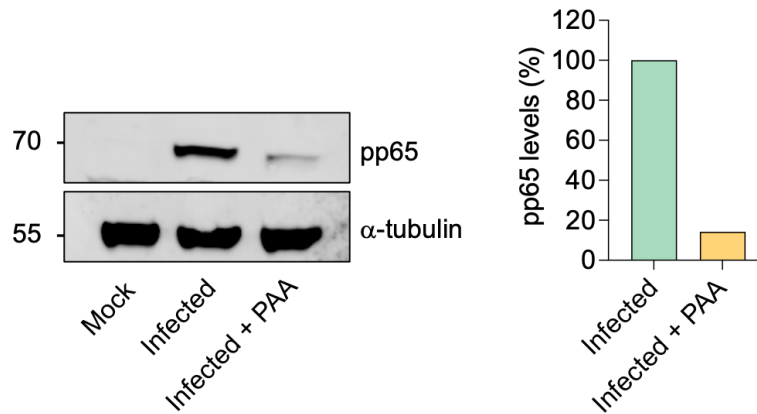

66

67 **Fig. S4. PAA treatment blocks late protein accumulation.**

68 Infected cells were treated or not with PAA for 48 hrs and then immunoblotting was used  
69 to evaluate expression levels of the late HCMV gene product pp65 (left, with band  
70 quantification to the right).

71

72

73
